# Supplementary material for: Temporal and Spatial Distribution of Phytoplankton and Role of Environment Factors in the Shending River Backwater in the Danjiangkou Reservoir Area
Source: MDPI journal article supplement (doi:10.3390/w16020326), 2024-01-18
Supplement: s1 [file s1]

Table S1. The list of phytoplankton species at sampling site 1&2 in the Shending River Backwater (March - August 2021).

|    | Class             | Species                                  | sampling site<br>1 | sampling site<br>2 |
|----|-------------------|------------------------------------------|--------------------|--------------------|
| 1  | Bacillariophyceae | <i>Cocconeis placentula</i>              | +                  |                    |
| 2  |                   | <i>Asterionella formosa</i>              |                    | +                  |
| 3  |                   | <i>Cyclotella meneghiniana</i>           | +                  | +                  |
| 4  |                   | <i>Diatoma sp.</i>                       |                    | +                  |
| 5  |                   | <i>Cocconeis placentula var.euglypta</i> | +                  |                    |
| 6  |                   | <i>Fragilaria biceps</i>                 | +                  |                    |
| 7  |                   | <i>Fragilaria crotonensis</i>            | +                  | +                  |
| 8  |                   | <i>Chaetoceros sp.</i>                   | +                  |                    |
| 9  |                   | <i>Gomphonema sp.</i>                    | +                  | +                  |
| 10 |                   | <i>Cymbella sp.</i>                      |                    | +                  |
| 11 |                   | <i>Gyrosigma sp.</i>                     | +                  | +                  |
| 12 |                   | <i>Melosira varians</i>                  | +                  |                    |
| 13 |                   | <i>Navicula rhynchocephala</i>           | +                  | +                  |
| 14 |                   | <i>Skeletonema costatum</i>              |                    | +                  |
| 15 |                   | <i>Nitzschia sp.</i>                     | +                  | +                  |
| 16 |                   | <i>Pinnularia sp.</i>                    | +                  | +                  |
| 17 |                   | <i>Schroederia nitzschioides</i>         | +                  | +                  |
| 18 |                   | <i>Synedra sp.</i>                       | +                  |                    |
| 19 | Cyanophyceae      | <i>Merismopedia punctata</i>             |                    | +                  |
| 20 |                   | <i>Merismopedia sinica</i>               | +                  |                    |
| 21 |                   | <i>Merismopedia sp.</i>                  | +                  |                    |
| 22 |                   | <i>Microcystis aeruginosa</i>            |                    | +                  |
| 23 |                   | <i>Microcystis sp.</i>                   | +                  | +                  |
| 24 |                   | <i>Oscillatoria tenuis</i>               |                    | +                  |
| 25 |                   | <i>Oscillatoria sp.</i>                  | +                  | +                  |
| 26 |                   | <i>Dactylococcopsis acicularis</i>       | +                  |                    |
| 27 |                   | <i>Pseudanabaena sp.</i>                 | +                  | +                  |
| 28 |                   | <i>Chroococcus sp.</i>                   | +                  | +                  |
| 29 |                   | <i>Dolichospermum planctonicum</i>       | +                  |                    |
| 30 |                   | <i>Gomphosphaeria lacustris</i>          | +                  | +                  |
| 31 |                   | <i>Anabaena variabilis</i>               |                    | +                  |
| 32 |                   | <i>Nostoc spongiaeforme</i>              | +                  |                    |
| 33 |                   | <i>Raphidiopsis sinensis</i>             | +                  | +                  |
| 34 |                   | <i>Cylindrospermopsis</i>                | +                  | +                  |
| 35 |                   | <i>Raphidiopsis curvata</i>              | +                  | +                  |
| 36 | Chlorophyceae     | <i>Actinastrum sp.</i>                   | +                  |                    |
| 37 |                   | <i>Ankistrodesmus falcatus</i>           | +                  |                    |
| 38 |                   | <i>Ankistrodesmus sp.</i>                | +                  | +                  |

|    |                |                                           |   |   |
|----|----------------|-------------------------------------------|---|---|
| 39 |                | <i>Chlamydomonas simplex</i>              | + | + |
| 40 |                | <i>Chlorella vulgaris</i>                 | + |   |
| 41 |                | <i>Cosmarium sp.</i>                      | + | + |
| 42 |                | <i>Crucigenia sp.</i>                     | + |   |
| 43 |                | <i>Dictyosphaerium sp.</i>                | + | + |
| 44 |                | <i>Euastrum ansutum</i>                   | + |   |
| 45 |                | <i>Pediastrum duplex</i>                  | + | + |
| 46 |                | <i>Pediastrum simplex</i>                 | + |   |
| 47 |                | <i>Pediastrum tetras</i>                  |   | + |
| 48 |                | <i>Scenedesmus bicaudatus</i>             | + | + |
| 49 |                | <i>Scenedesmus bijuga</i>                 | + | + |
| 50 |                | <i>Scenedesmus brasiliensis</i>           |   | + |
| 51 |                | <i>Scenedesmus dimorphus</i>              | + | + |
| 52 |                | <i>Scenedesmus granulatus</i>             |   | + |
| 53 |                | <i>Scenedesmus protuberans</i>            | + | + |
| 54 |                | <i>Scenedesmus quadricauda</i>            | + | + |
| 55 |                | <i>Scenedesmus quadricauda var parvus</i> |   | + |
| 56 |                | <i>Scenedesmus sp.</i>                    | + | + |
| 57 |                | <i>Staurastrum sp.</i>                    | + | + |
| 58 | Cryptophyceae  | <i>Chroomonas acuta</i>                   |   | + |
| 59 |                | <i>Cryptomonas ovata</i>                  |   | + |
| 60 |                | <i>Cryptomonas erosa</i>                  |   | + |
| 61 | Euglenophyceae | <i>Euglena oxyuris</i>                    | + |   |
| 62 |                | <i>Euglena sp.</i>                        | + |   |
| 63 |                | <i>Phacus sp.</i>                         |   | + |
| 64 |                | <i>Strombomonas sp.</i>                   |   | + |
| 65 | Dinophyceae    | <i>Ceratium hirundinella</i>              | + | + |
| 66 |                | <i>Gymnodinium sp.</i>                    |   | + |
| 67 |                | <i>Peridinium bipes</i>                   | + | + |
| 68 | Phaeophyceae   | <i>Khawkinea acutecouato</i>              | + |   |
| 69 | Chrysophyceae  | <i>Chromulina sp.</i>                     |   | + |

The identified species were categorized into taxa using the modern systematics known as Catalogue of Life.

Table S2. Results of the Pearson correlation analysis at sampling site 1.

|                    | WT     | DO     | PAR    | WL     | COD <sub>Mn</sub> | NH <sub>3</sub> -N | TP     | TN     | N/P    | Bacillariophyceae | Chlorophyceae | Cyanophyceae | Other algae |
|--------------------|--------|--------|--------|--------|-------------------|--------------------|--------|--------|--------|-------------------|---------------|--------------|-------------|
| WT                 |        | 0.032  | 0.194  | 0.356  | 0.363             | 0.360              | 0.167  | 0.192  | 0.133  | 0.386             | 0.325         | 0.446        | 0.454       |
| DO                 | -0.851 |        | 0.720  | 0.446  | 0.070             | 0.983              | 0.005  | 0.042  | 0.004  | 0.395             | 0.343         | 0.424        | 0.434       |
| PAR                | 0.615  | -0.189 |        | 0.243  | 0.993             | 0.145              | 0.915  | 0.728  | 0.897  | 0.489             | 0.468         | 0.536        | 0.537       |
| WL                 | 0.462  | -0.389 | 0.565  |        | 0.183             | 0.883              | 0.517  | 0.088  | 0.312  | 0.026             | 0.027         | 0.020        | 0.022       |
| COD <sub>Mn</sub>  | 0.457  | -0.776 | 0.005  | 0.627  |                   | 0.343              | 0.027  | 0.002  | 0.006  | 0.176             | 0.171         | 0.157        | 0.163       |
| NH <sub>3</sub> -N | -0.459 | -0.011 | -0.671 | -0.078 | 0.473             |                    | 0.665  | 0.592  | 0.610  | 0.788             | 0.844         | 0.729        | 0.726       |
| TP                 | 0.644  | -0.941 | -0.057 | 0.334  | 0.863             | 0.227              |        | 0.035  | 0.001  | 0.524             | 0.480         | 0.522        | 0.535       |
| TN                 | -0.617 | 0.829  | -0.184 | -0.747 | -0.968            | -0.279             | -0.844 |        | 0.005  | 0.082             | 0.073         | 0.076        | 0.080       |
| N/P                | -0.685 | 0.947  | -0.069 | -0.501 | -0.935            | -0.266             | -0.968 | 0.940  |        | 0.279             | 0.250         | 0.280        | 0.289       |
| Bacillariophyceae  | 0.437  | -0.430 | 0.355  | 0.866  | 0.635             | 0.142              | 0.329  | -0.756 | -0.531 |                   | 0.000         | 0.000        | 0.000       |
| Chlorophyceae      | 0.489  | -0.474 | 0.372  | 0.864  | 0.640             | 0.104              | 0.362  | -0.771 | -0.558 | 0.998             |               | 0.000        | 0.000       |
| Cyanophyceae       | 0.389  | -0.407 | 0.321  | 0.881  | 0.656             | 0.183              | 0.331  | -0.765 | -0.530 | 0.997             | 0.991         |              | 0.000       |
| Other algae        | 0.383  | -0.398 | 0.319  | 0.878  | 0.649             | 0.185              | 0.321  | -0.759 | -0.522 | 0.997             | 0.991         | 1.000        |             |

The lower half of the table contains values of  $r$ , while the upper half of the table contains values of  $p$ .

Table S3. Results of the Pearson correlation analysis at sampling site 2.

|                    | WT     | DO     | PAR    | WL     | COD <sub>Mn</sub> | NH <sub>3</sub> -N | TP     | TN     | N/P    | Cryptophyceae | Chlorophyceae | Cyanophyceae | Other algae |
|--------------------|--------|--------|--------|--------|-------------------|--------------------|--------|--------|--------|---------------|---------------|--------------|-------------|
| WT                 |        | 0.181  | 0.221  | 0.360  | 0.084             | 0.280              | 0.925  | 0.027  | 0.560  | 0.000         | 0.242         | 0.445        | 0.253       |
| DO                 | -0.629 |        | 0.622  | 0.094  | 0.010             | 0.007              | 0.727  | 0.621  | 0.793  | 0.267         | 0.042         | 0.010        | 0.005       |
| PAR                | 0.587  | -0.257 |        | 0.242  | 0.731             | 0.654              | 0.517  | 0.097  | 0.227  | 0.212         | 0.282         | 0.536        | 0.502       |
| WL                 | 0.459  | -0.738 | 0.565  |        | 0.137             | 0.023              | 0.736  | 0.747  | 0.664  | 0.457         | 0.235         | 0.021        | 0.012       |
| COD <sub>Mn</sub>  | 0.752  | -0.919 | 0.181  | 0.680  |                   | 0.011              | 0.436  | 0.510  | 0.589  | 0.138         | 0.212         | 0.075        | 0.018       |
| NH <sub>3</sub> -N | 0.529  | -0.932 | 0.235  | 0.873  | 0.913             |                    | 0.443  | 0.838  | 0.427  | 0.392         | 0.178         | 0.005        | 0.000       |
| TP                 | 0.050  | -0.184 | -0.334 | 0.178  | 0.397             | 0.392              |        | 0.755  | 0.057  | 0.998         | 0.655         | 0.711        | 0.552       |
| TN                 | 0.863  | -0.258 | 0.733  | 0.170  | 0.340             | 0.108              | -0.165 |        | 0.165  | 0.015         | 0.373         | 0.929        | 0.743       |
| N/P                | 0.302  | 0.139  | 0.581  | -0.228 | -0.282            | -0.404             | -0.798 | 0.647  |        | 0.471         | 0.475         | 0.629        | 0.561       |
| Cryptophyceae      | -0.994 | 0.542  | -0.596 | -0.380 | -0.679            | -0.432             | 0.001  | -0.900 | -0.370 |               | 0.303         | 0.579        | 0.358       |
| Chlorophyceae      | 0.566  | -0.828 | 0.528  | 0.572  | 0.596             | 0.633              | -0.234 | 0.448  | 0.366  | -0.509        |               | 0.071        | 0.117       |
| Cyanophyceae       | 0.389  | -0.918 | 0.320  | 0.880  | 0.767             | 0.942              | 0.195  | 0.047  | -0.253 | -0.288        | 0.774         |              | 0.002       |
| Other algae        | 0.555  | -0.939 | 0.346  | 0.909  | 0.887             | 0.991              | 0.308  | 0.173  | -0.302 | -0.461        | 0.706         | 0.965        |             |

The lower half of the table contains values of  $r$ , while the upper half of the table contains values of  $p$ .

Table S4. Mantel test result at sampling site 1.

| Class of Phytoplankton species | Environmental factors | r value | p value |
|--------------------------------|-----------------------|---------|---------|
| Chlorophyceae                  | WT                    | 0.570   | 0.043   |
| Chlorophyceae                  | PAR                   | 0.370   | 0.068   |
| Chlorophyceae                  | WL                    | 0.399   | 0.060   |
| Chlorophyceae                  | DO                    | 0.011   | 0.424   |
| Chlorophyceae                  | COD <sub>Mn</sub>     | -0.079  | 0.514   |
| Chlorophyceae                  | NH <sub>3</sub> -N    | 0.274   | 0.146   |
| Chlorophyceae                  | TP                    | -0.287  | 0.871   |
| Chlorophyceae                  | TN                    | 0.121   | 0.313   |
| Chlorophyceae                  | N/P                   | -0.132  | 0.681   |
| Cyanophyceae                   | WT                    | -0.129  | 0.681   |
| Cyanophyceae                   | PAR                   | -0.392  | 0.919   |
| Cyanophyceae                   | WL                    | 0.450   | 0.085   |
| Cyanophyceae                   | DO                    | 0.163   | 0.306   |
| Cyanophyceae                   | COD <sub>Mn</sub>     | 0.396   | 0.078   |
| Cyanophyceae                   | NH <sub>3</sub> -N    | -0.454  | 0.975   |
| Cyanophyceae                   | TP                    | 0.230   | 0.224   |
| Cyanophyceae                   | TN                    | 0.539   | 0.024   |
| Cyanophyceae                   | N/P                   | 0.247   | 0.218   |
| Bacillariophyceae              | WT                    | -0.033  | 0.493   |
| Bacillariophyceae              | PAR                   | -0.085  | 0.513   |
| Bacillariophyceae              | WL                    | 0.836   | 0.086   |
| Bacillariophyceae              | DO                    | -0.067  | 0.542   |
| Bacillariophyceae              | COD <sub>Mn</sub>     | 0.261   | 0.167   |
| Bacillariophyceae              | NH <sub>3</sub> -N    | -0.249  | 0.651   |
| Bacillariophyceae              | TP                    | -0.202  | 0.675   |
| Bacillariophyceae              | TN                    | 0.525   | 0.154   |
| Bacillariophyceae              | N/P                   | 0.035   | 0.486   |
| Others                         | WT                    | -0.036  | 0.504   |
| Others                         | PAR                   | -0.060  | 0.479   |
| Others                         | WL                    | 0.585   | 0.167   |
| Others                         | DO                    | -0.011  | 0.443   |
| Others                         | COD <sub>Mn</sub>     | 0.342   | 0.094   |
| Others                         | NH <sub>3</sub> -N    | -0.273  | 0.631   |
| Others                         | TP                    | -0.107  | 0.538   |
| Others                         | TN                    | 0.526   | 0.071   |
| Others                         | N/P                   | 0.133   | 0.240   |

Table S5. Mantel test result at sampling site 2.

| Class of Phytoplankton species | Environmental factors | r value | p value |
|--------------------------------|-----------------------|---------|---------|
| Chlorophyceae                  | WT                    | 0.176   | 0.275   |
| Chlorophyceae                  | DO                    | -0.097  | 0.465   |
| Chlorophyceae                  | PAR                   | 0.242   | 0.174   |
| Chlorophyceae                  | WL                    | -0.219  | 0.813   |
| Chlorophyceae                  | COD <sub>Mn</sub>     | -0.266  | 0.788   |
| Chlorophyceae                  | NH <sub>3</sub> -N    | -0.178  | 0.710   |
| Chlorophyceae                  | TP                    | 0.155   | 0.283   |
| Chlorophyceae                  | TN                    | 0.342   | 0.161   |
| Chlorophyceae                  | N/P                   | -0.065  | 0.531   |
| Cryptophyceae                  | WT                    | 0.557   | 0.015   |
| Cryptophyceae                  | DO                    | -0.048  | 0.325   |
| Cryptophyceae                  | PAR                   | -0.091  | 0.579   |
| Cryptophyceae                  | WL                    | -0.246  | 0.817   |
| Cryptophyceae                  | COD <sub>Mn</sub>     | 0.206   | 0.221   |
| Cryptophyceae                  | NH <sub>3</sub> -N    | -0.059  | 0.410   |
| Cryptophyceae                  | TP                    | -0.136  | 0.689   |
| Cryptophyceae                  | TN                    | 0.121   | 0.260   |
| Cryptophyceae                  | N/P                   | -0.223  | 0.689   |
| Cyanophyceae                   | WT                    | 0.059   | 0.336   |
| Cyanophyceae                   | DO                    | 0.348   | 0.188   |
| Cyanophyceae                   | PAR                   | -0.269  | 0.751   |
| Cyanophyceae                   | WL                    | 0.328   | 0.208   |
| Cyanophyceae                   | COD <sub>Mn</sub>     | 0.485   | 0.083   |
| Cyanophyceae                   | NH <sub>3</sub> -N    | 0.549   | 0.033   |
| Cyanophyceae                   | TP                    | -0.351  | 0.965   |
| Cyanophyceae                   | TN                    | -0.090  | 0.554   |
| Cyanophyceae                   | N/P                   | -0.401  | 1.000   |
| Others                         | WT                    | 0.279   | 0.131   |
| Others                         | DO                    | 0.415   | 0.097   |
| Others                         | PAR                   | -0.147  | 0.657   |
| Others                         | WL                    | 0.374   | 0.142   |
| Others                         | COD <sub>Mn</sub>     | 0.626   | 0.043   |
| Others                         | NH <sub>3</sub> -N    | 0.646   | 0.029   |
| Others                         | TP                    | -0.126  | 0.678   |
| Others                         | TN                    | 0.095   | 0.351   |
| Others                         | N/P                   | -0.244  | 0.882   |
